# Supplementary material for: Left Ventricular Diastolic Dysfunction in ARDS Patients
Source: MDPI journal article supplement (doi:10.3390/jcm11205998), 2022-10-11
Supplement: s1 [file s1]

**Table S1.** Quantitative Computed-Tomography scan data according to the presence or absence of diastolic dysfunction. LPR: lung potential recruitment.

The role of the of PEEP between groups was assessed by two-ways repeated measures Analysis Of Variance (ANOVA) followed by all-pairwise comparisons (Holm-Sidak method).

|                            | Study population<br>N = 30 | Diastolic<br>dysfunction<br>N = 9 | No diastolic<br>dysfunction<br>N=21 | <i>p</i> <sub>group</sub> | <i>p</i> <sub>PEEP</sub> | <i>p</i> <sub>interaction</sub> |
|----------------------------|----------------------------|-----------------------------------|-------------------------------------|---------------------------|--------------------------|---------------------------------|
| Total lung weight (g)      |                            |                                   |                                     |                           |                          |                                 |
| 5 cmH <sub>2</sub> O       | 1440 [1169 – 1934]         | 1669 [1354 – 1909]                | 1554 [1146 – 1942]                  | <b>0.004</b>              | <b>0.002</b>             | <b>0.010</b>                    |
| 15 cmH <sub>2</sub> O      | 1630 [1207 – 1957]         | 1626 [1176 – 1711]                | 1634 [1299 – 1962]                  |                           |                          |                                 |
| Total lung gas volume (mL) |                            |                                   |                                     |                           |                          |                                 |
| 5 cmH <sub>2</sub> O       | 808 [455 – 1381]           | 977 [712 – 1409]                  | 613 [426 – 1295]                    | 0.722                     | <b>&lt;0.001</b>         | 0.338                           |
| 15 cmH <sub>2</sub> O      | 2356 [1353 – 3183]         | 2206 [1523 – 2920]                | 2500 [1297 – 3248]                  |                           |                          |                                 |
| Not aerated tissue (g)     |                            |                                   |                                     |                           |                          |                                 |
| 5 cmH <sub>2</sub> O       | 631 [515 – 1152]           | 631 [536 – 1043]                  | 631 [510 – 1315]                    | 0.651                     | <b>&lt;0.001</b>         | 0.762                           |
| 15 cmH <sub>2</sub> O      | 253 [107 – 640]            | 217 [139 – 432]                   | 409 [99 – 641]                      |                           |                          |                                 |
| Not aerated tissue (%)     |                            |                                   |                                     |                           |                          |                                 |
| 5 cmH <sub>2</sub> O       | 50 [40 – 59]               | 51 [45 – 56]                      | 49 [37 – 62]                        | 0.542                     | <b>&lt;0.001</b>         | 0.366                           |
| 15 cmH <sub>2</sub> O      | 29 [14 – 45]               | 13 [11 – 36]                      | 30 [21 – 44]                        |                           |                          |                                 |
| Poorly aerated tissue (g)  |                            |                                   |                                     |                           |                          |                                 |
| 5 cmH <sub>2</sub> O       | 505 [301 – 566]            | 566 [342 – 669]                   | 420 [269 – 535]                     | 0.482                     | 0.497                    | 0.173                           |
| 15 cmH <sub>2</sub> O      | 427 [239 – 655]            | 424 [273 – 628]                   | 430 [232 – 664]                     |                           |                          |                                 |
| Poorly aerated tissue (%)  |                            |                                   |                                     |                           |                          |                                 |
| 5 cmH <sub>2</sub> O       | 28 [21 – 33]               | 32 [30 – 42]                      | 25 [21 – 32]                        | 0.097                     | <b>0.004</b>             | <b>0.002</b>                    |
| 15 cmH <sub>2</sub> O      | 27 [19 – 33]               | 29 [22 – 39]                      | 26 [19 – 33]                        |                           |                          |                                 |
| Well aerated tissue (g)    |                            |                                   |                                     |                           |                          |                                 |
| 5 cmH <sub>2</sub> O       | 276 [130 – 432]            | 245 [209 – 422]                   | 307 [130 – 436]                     | 0.887                     | <b>&lt;0.001</b>         | 0.856                           |
| 15 cmH <sub>2</sub> O      | 662 [459 – 853]            | 655 [617 – 767]                   | 668 [448 – 858]                     |                           |                          |                                 |
| Well aerated tissue (%)    |                            |                                   |                                     |                           |                          |                                 |
| 5 cmH <sub>2</sub> O       | 22 [11 – 32]               | 12 [11 – 26]                      | 31 [11 – 34]                        | 0.689                     | <b>&lt;0.001</b>         | 0.210                           |
| 15 cmH <sub>2</sub> O      | 40 [29 – 53]               | 41 [32 – 51]                      | 39 [26 – 52]                        |                           |                          |                                 |
| Over inflated tissue (g)   |                            |                                   |                                     |                           |                          |                                 |
| 5 cmH <sub>2</sub> O       | 0 [0 – 2]                  | 0 [0 – 2]                         | 0 [0 – 2]                           | 0.548                     | <b>&lt;0.001</b>         | 0.616                           |
| 15 cmH <sub>2</sub> O      | 8 [1 – 65]                 | 9 [5 – 40]                        | 7 [1 – 67]                          |                           |                          |                                 |
| Over inflated tissue (%)   |                            |                                   |                                     |                           |                          |                                 |
| 5 cmH <sub>2</sub> O       | 0 [0 – 0]                  | 0 [0 – 0]                         | 0 [0 – 1]                           | 0.399                     | <b>0.048</b>             | 0.732                           |
| 15 cmH <sub>2</sub> O      | 0 [0 – 4]                  | 0 [0 – 2]                         | 0 [0 – 5]                           |                           |                          |                                 |
| LPR (%)                    | 32.5 [10.5 – 39.2]         | 33.3 [27.3 – 41.4]                | 30.6 [20.0 – 38.8]                  | 0.456                     |                          |                                 |

**Table S2.** Haemodynamic characteristics according to the presence or absence of diastolic dysfunction.

The role of the of PEEP between groups was assessed by two-ways repeated measures Analysis Of Variance (ANOVA) followed by all-pairwise comparisons (Holm-Sidak method).

|                            | Study population<br>N = 30 | Diastolic<br>dysfunction<br>N = 9 | No diastolic<br>dysfunction<br>N=21 | <i>p</i> <sub>group</sub> | <i>p</i> <sub>PEEP</sub> | <i>p</i> <sub>interaction</sub> |
|----------------------------|----------------------------|-----------------------------------|-------------------------------------|---------------------------|--------------------------|---------------------------------|
| Heart rate (bpm)           |                            |                                   |                                     |                           |                          |                                 |
| 5 cmH <sub>2</sub> O       | 89 [72 – 107]              | 70 [60 – 97]                      | 94 [82 – 110]                       | 0.059                     | 0.532                    | 0.607                           |
| 15 cmH <sub>2</sub> O      | 86 [65 – 104]              | 65 [58 – 100]                     | 93 [82 – 111]                       |                           |                          |                                 |
| SBP (mmHg)                 |                            |                                   |                                     |                           |                          |                                 |
| 5 cmH <sub>2</sub> O       | 126 [114 – 141]            | 127 [120 – 140]                   | 125 [113 – 141]                     | 0.773                     | <b>0.003</b>             | 0.349                           |
| 15 cmH <sub>2</sub> O      | 118 [106 – 132]            | 111 [109 – 133]                   | 120 [106 – 128]                     |                           |                          |                                 |
| DBP (mmHg)                 |                            |                                   |                                     |                           |                          |                                 |
| 5 cmH <sub>2</sub> O       | 60 [56 – 64]               | 60 [56 – 61]                      | 58 [54 – 68]                        | 0.636                     | 0.338                    | 0.340                           |
| 15 cmH <sub>2</sub> O      | 57 [53 – 66]               | 57 [55 – 64]                      | 57 [52 – 67]                        |                           |                          |                                 |
| MAP (mmHg)                 |                            |                                   |                                     |                           |                          |                                 |
| 5 cmH <sub>2</sub> O       | 81 [74 – 91]               | 88 [75 – 91]                      | 80 [72 – 87]                        | 0.733                     | <b>0.012</b>             | 0.585                           |
| 15 cmH <sub>2</sub> O      | 75 [71 – 86]               | 75 [73 – 90]                      | 75 [69 – 85]                        |                           |                          |                                 |
| CVP (mmHg)                 |                            |                                   |                                     |                           |                          |                                 |
| PEEP 5 cmH <sub>2</sub> O  | 11 [9 – 13]                | 12 [8 – 13]                       | 11 [10 – 13]                        | 0.298                     | <b>&lt;0.001</b>         | 0.342                           |
| PEEP 15 cmH <sub>2</sub> O | 14 [11 – 17]               | 14 [9 – 15]                       | 14 [12 – 17]                        |                           |                          |                                 |
